# Supplementary material for: Functionally defined white matter of the macaque monkey brain reveals a dorso-ventral attention network
Source: eLife journal article supplement (doi:10.7554/elife.40520), 2019-01-02
Supplement: supp [file elife-40520-supp-v1.zip]

Archive with 12 entries (12 files):
- elife_poa_e40520_Figure_4_figure_supplement_1.pdf
- elife_poa_e40520_Figure_5_video_1.mp4
- elife_poa_e40520_Figure_2_figure_supplement_1.pdf
- elife_poa_e40520_Figure_3_figure_supplement_3.pdf
- elife_poa_e40520_Figure_4_figure_supplement_4.pdf
- elife_poa_e40520_Figure_3_figure_supplement_1.pdf
- elife_poa_e40520_Supplementary_file_1.docx
- elife_poa_e40520_Figure_4_figure_supplement_3.pdf
- elife_poa_e40520_Transparent_Reporting_File.pdf
- elife_poa_e40520_Figure_1_figure_supplement_1.pdf
- elife_poa_e40520_Figure_4_figure_supplement_2.pdf
- elife_poa_e40520_Figure_3_figure_supplement_2.pdf
