# Supplementary figures and images for: Functionally defined white matter of the macaque monkey brain reveals a dorso-ventral attention network
Source: eLife journal article supplement (doi:10.7554/elife.40520), 2019-01-02

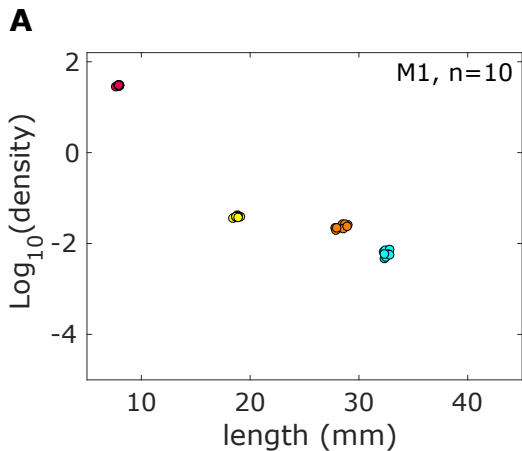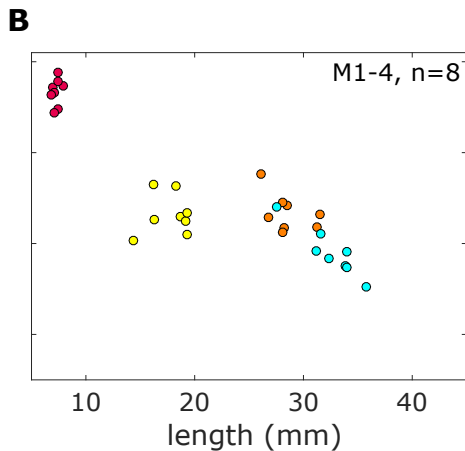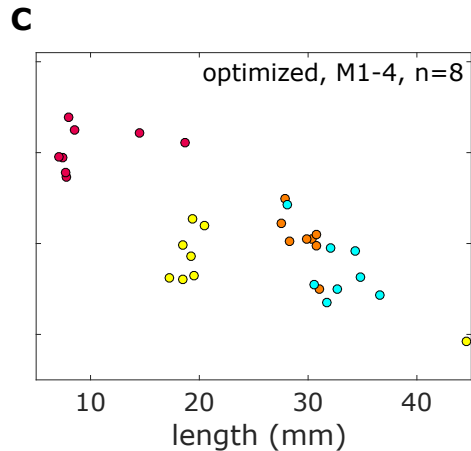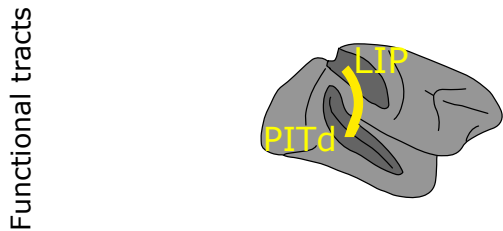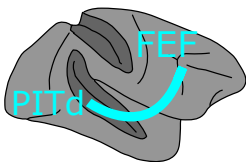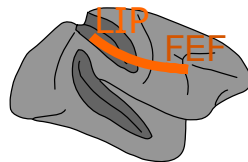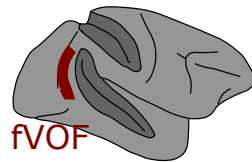

Supplement: supp [file elife-40520-supp-v1.zip]

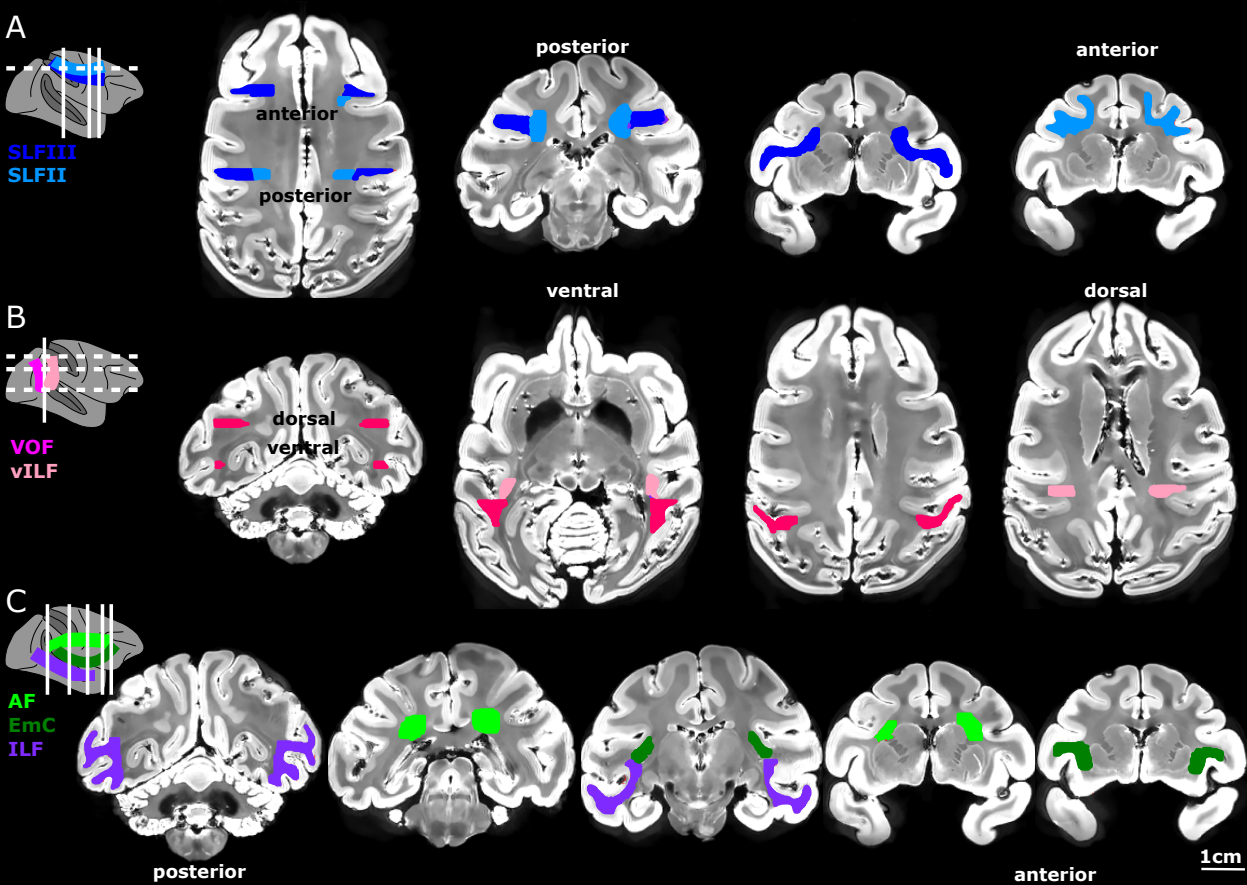

Supplement: supp [file elife-40520-supp-v1.zip]

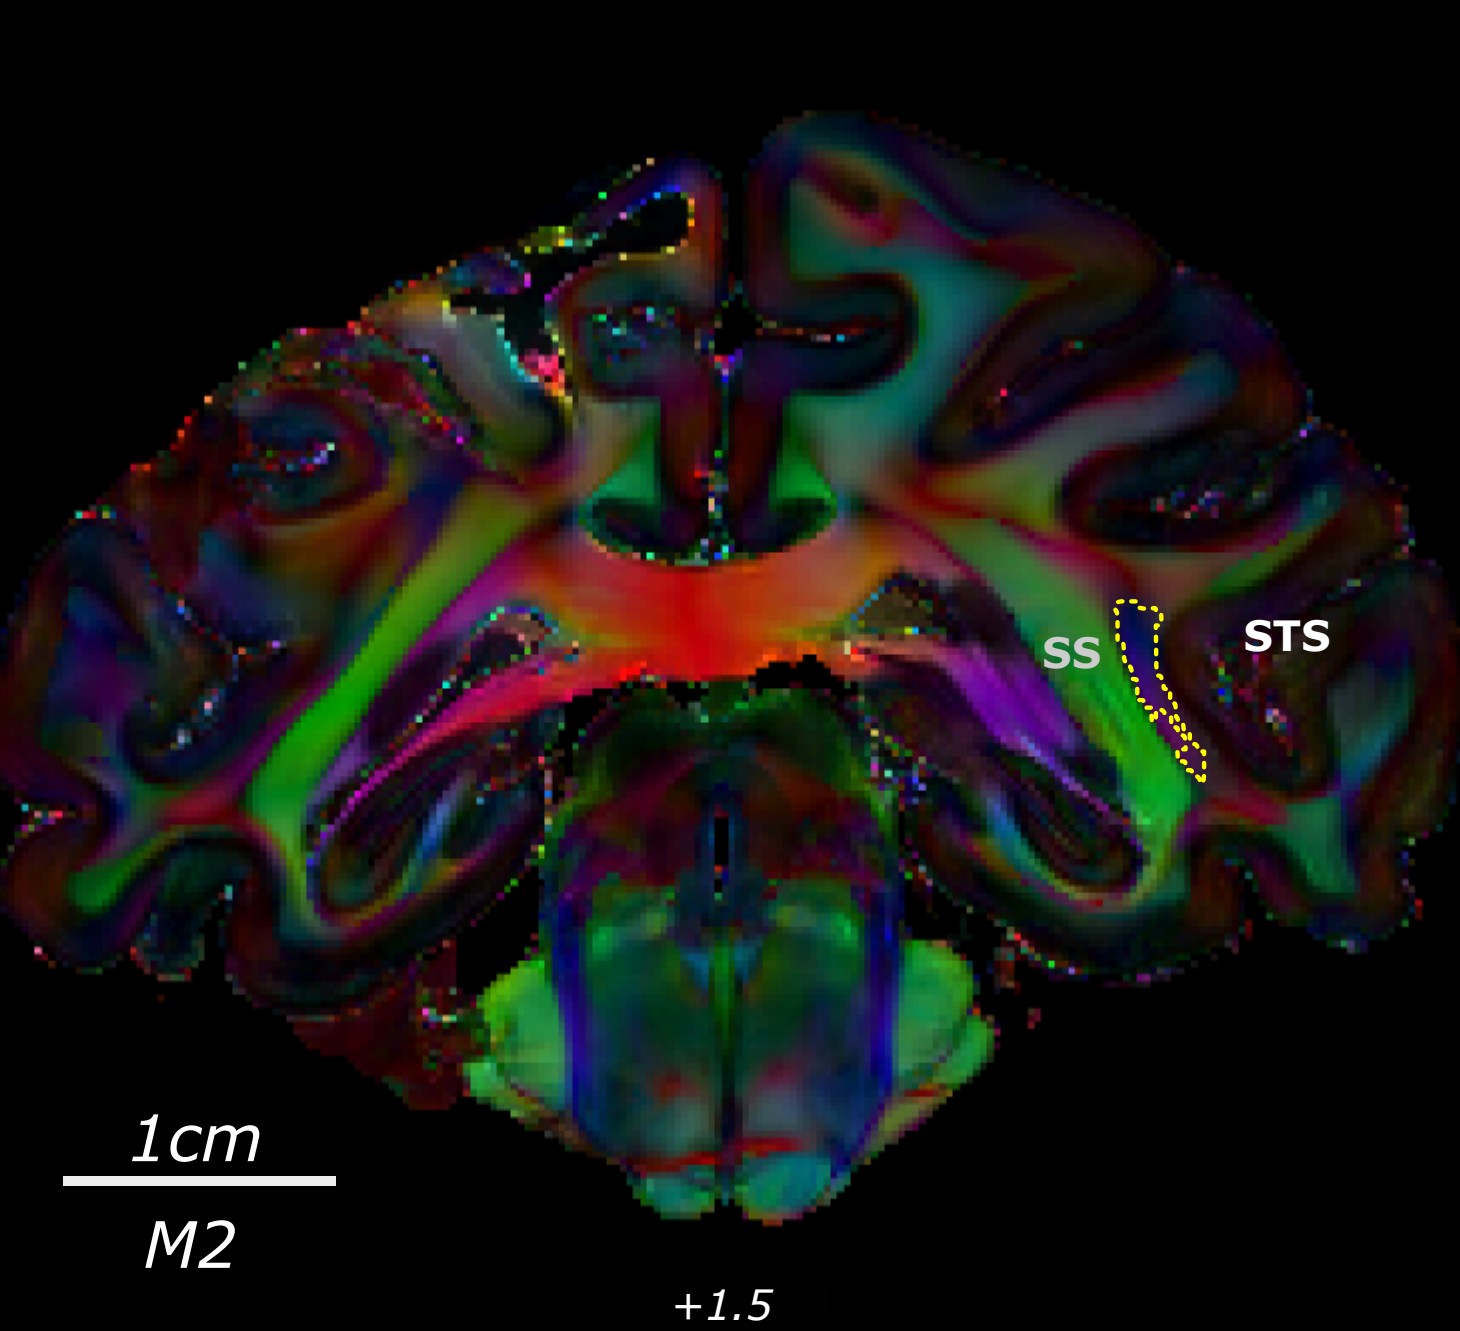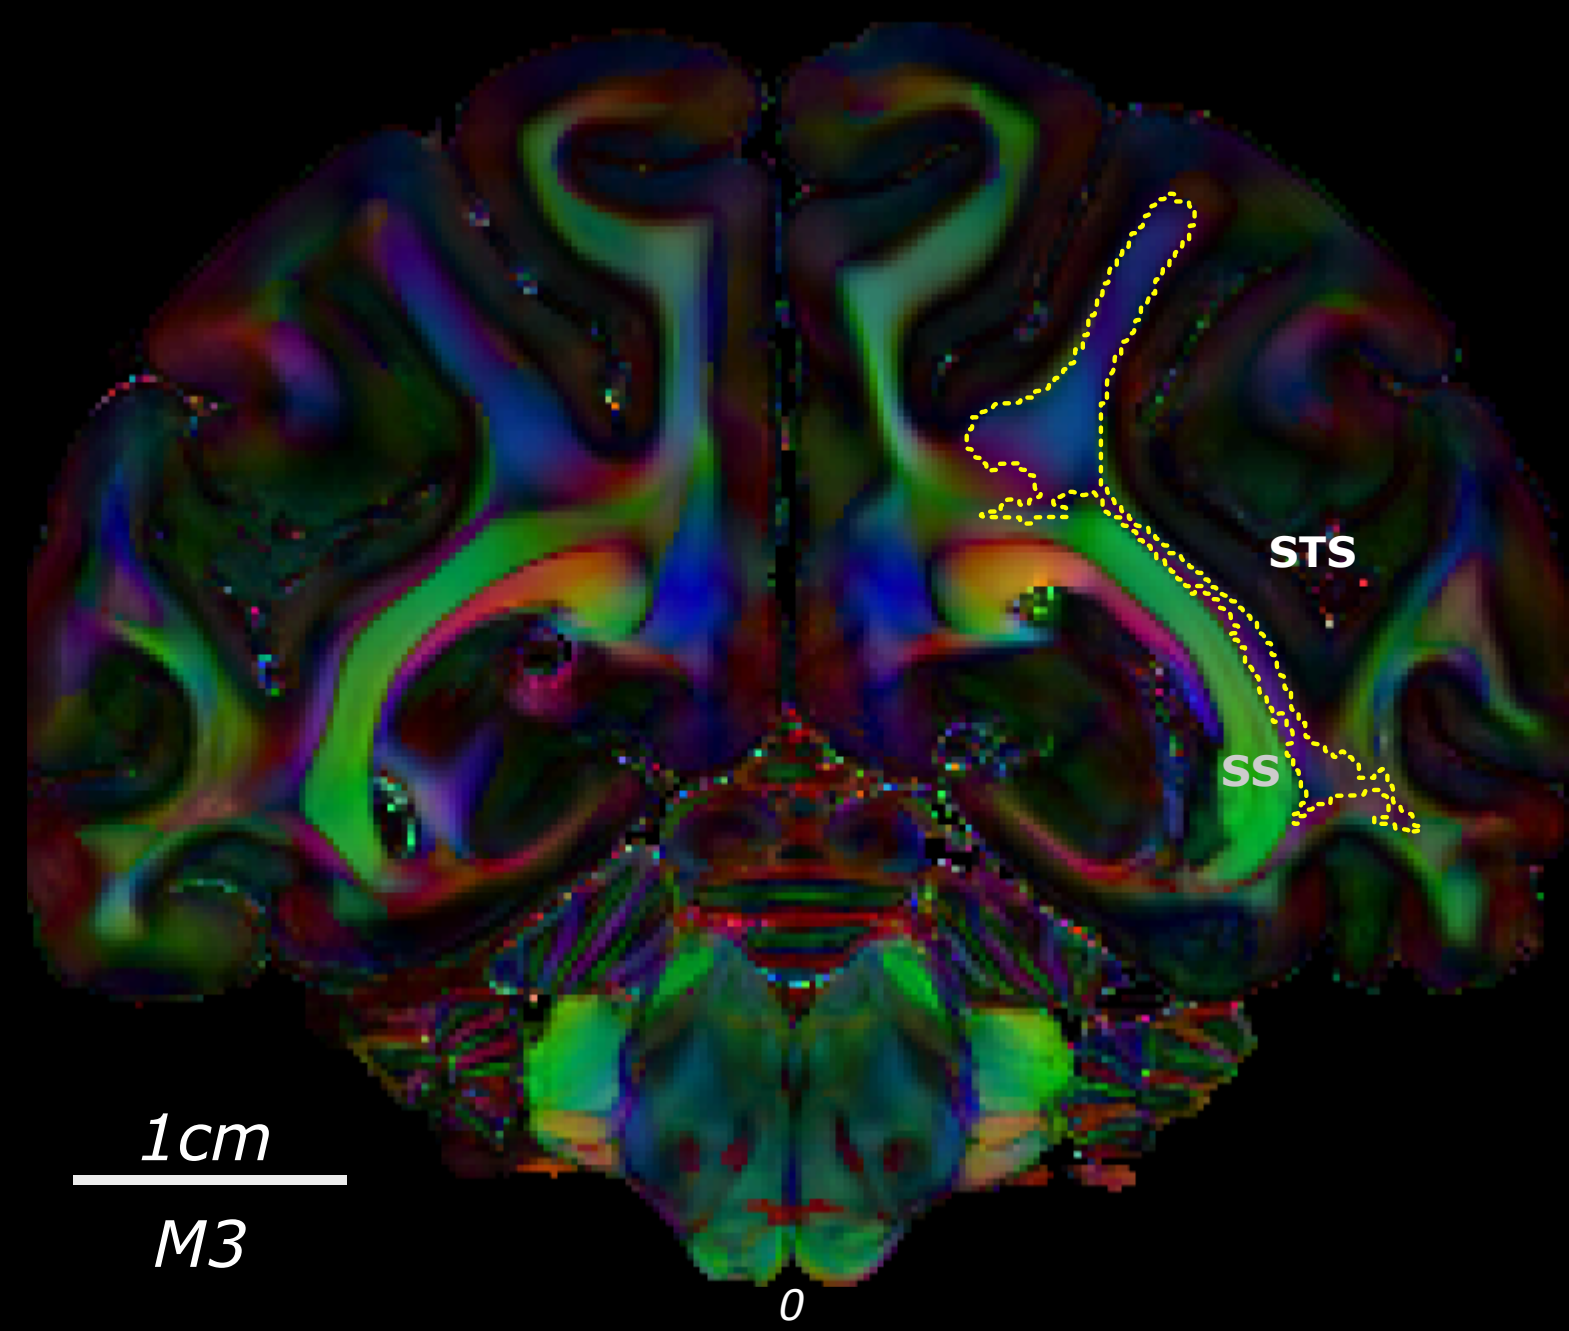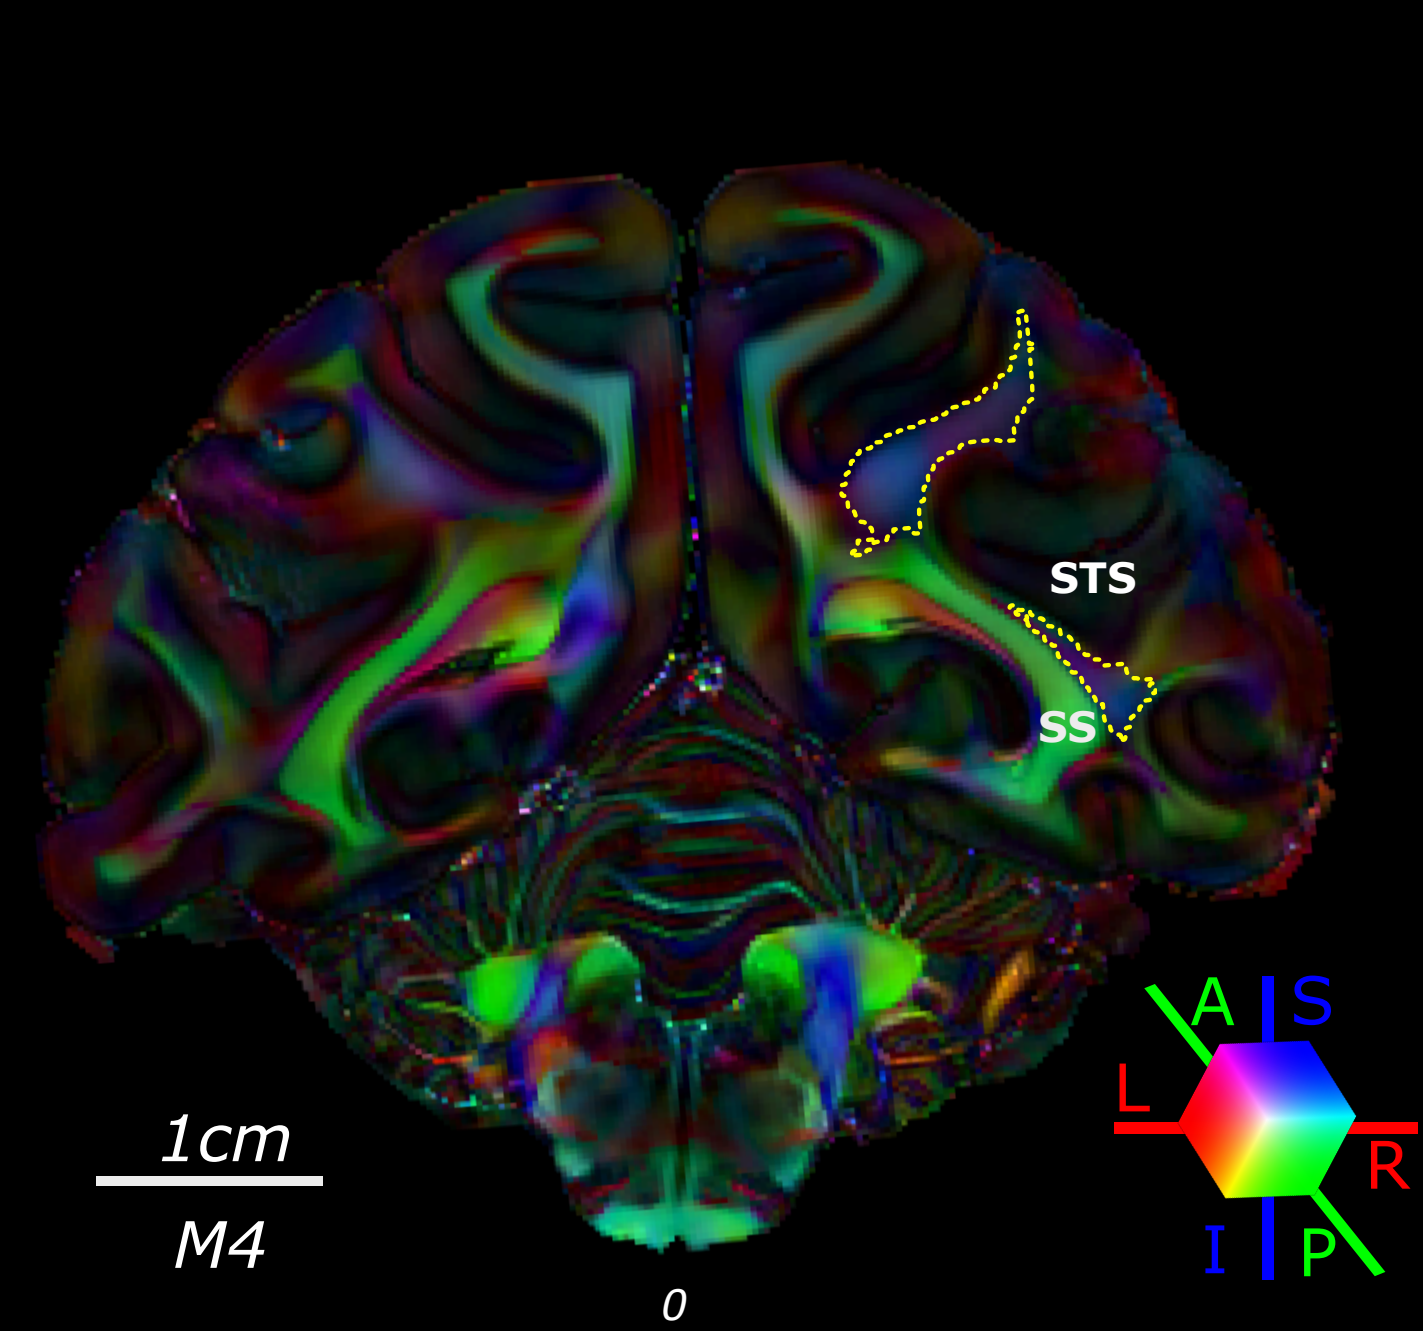

Supplement: supp [file elife-40520-supp-v1.zip › elife_poa_e40520_Figure_2_figure_supplement_1.pdf]

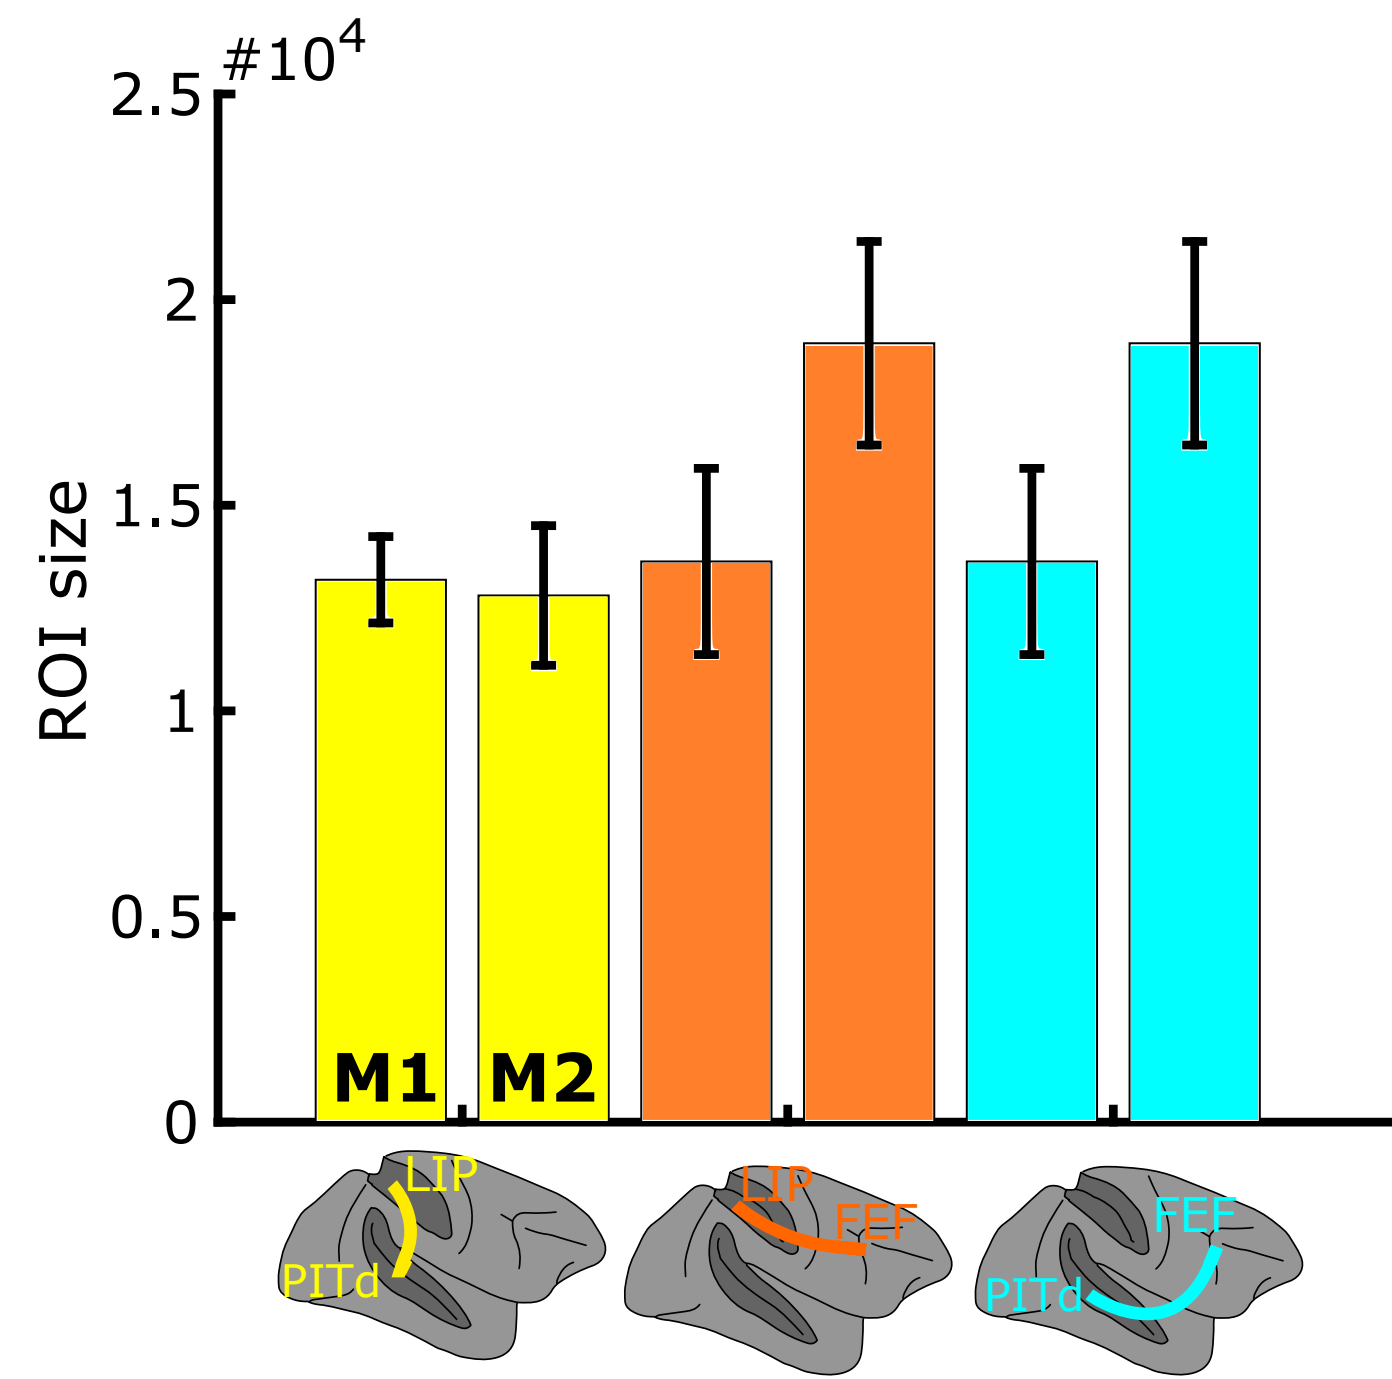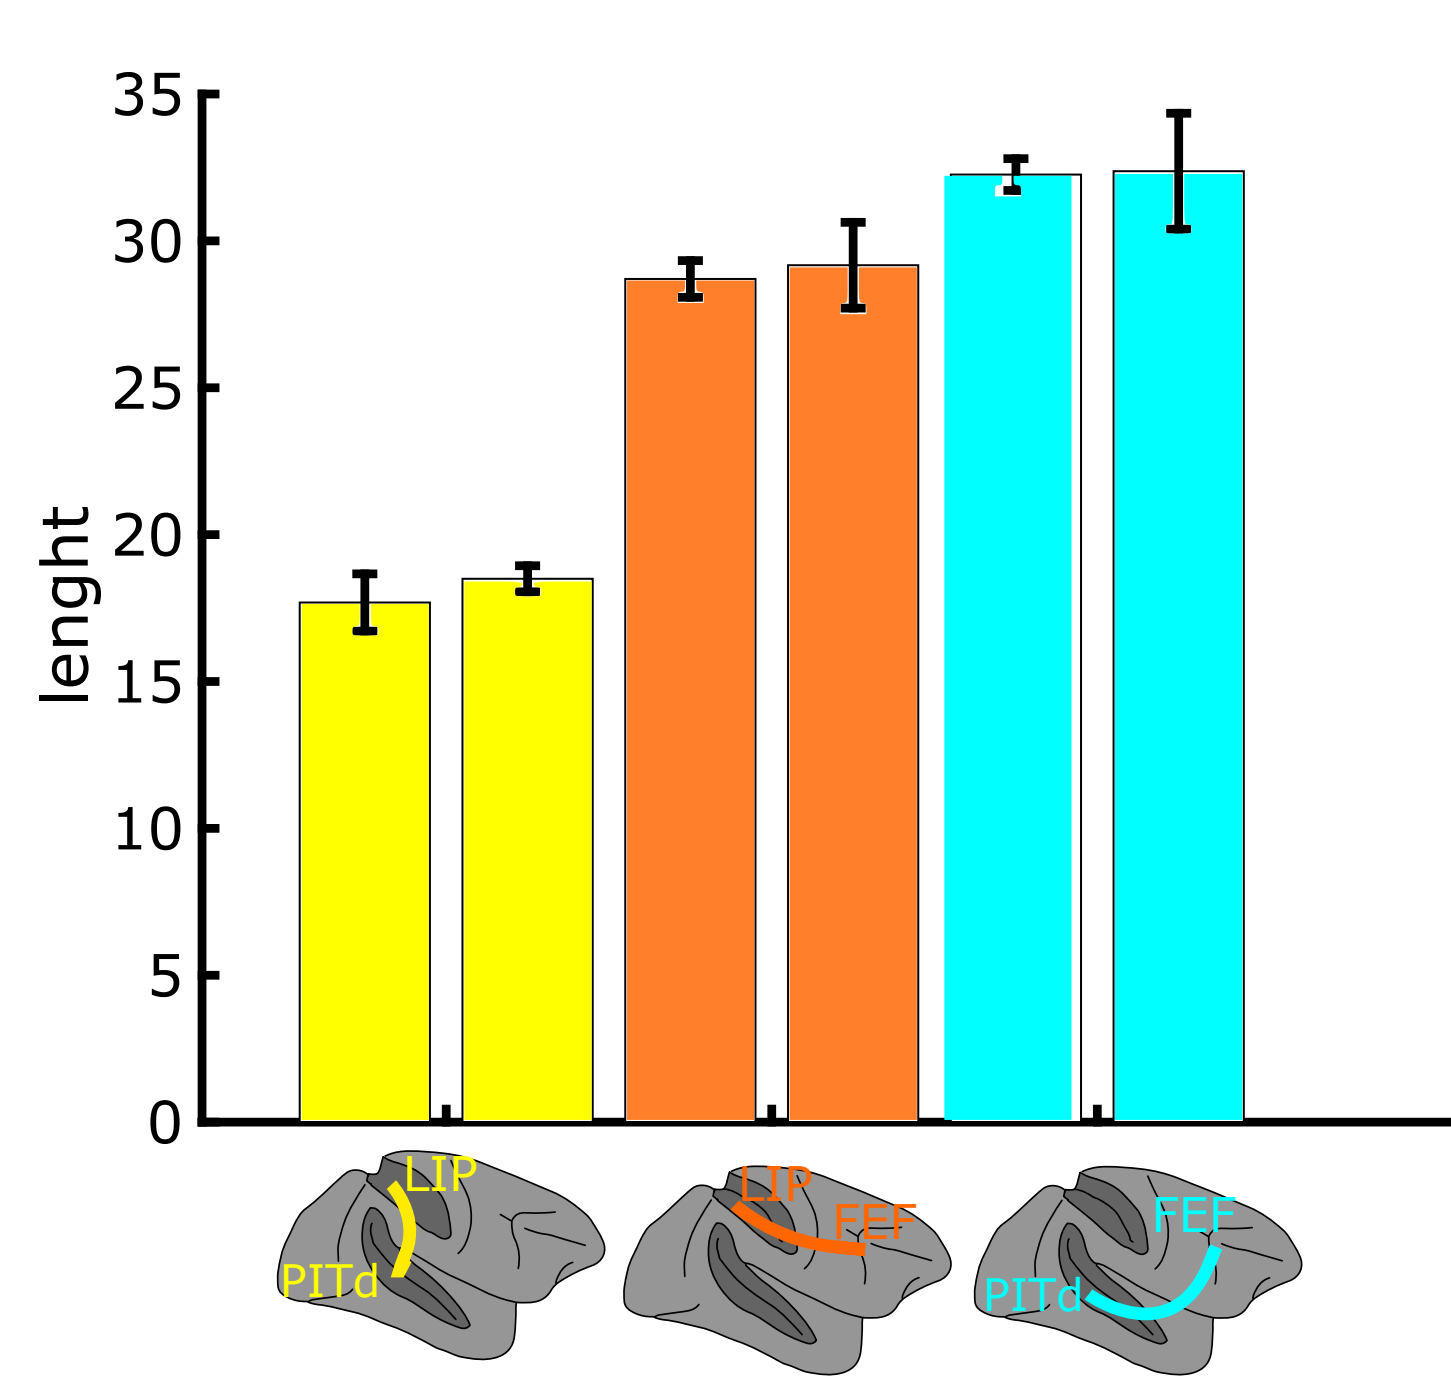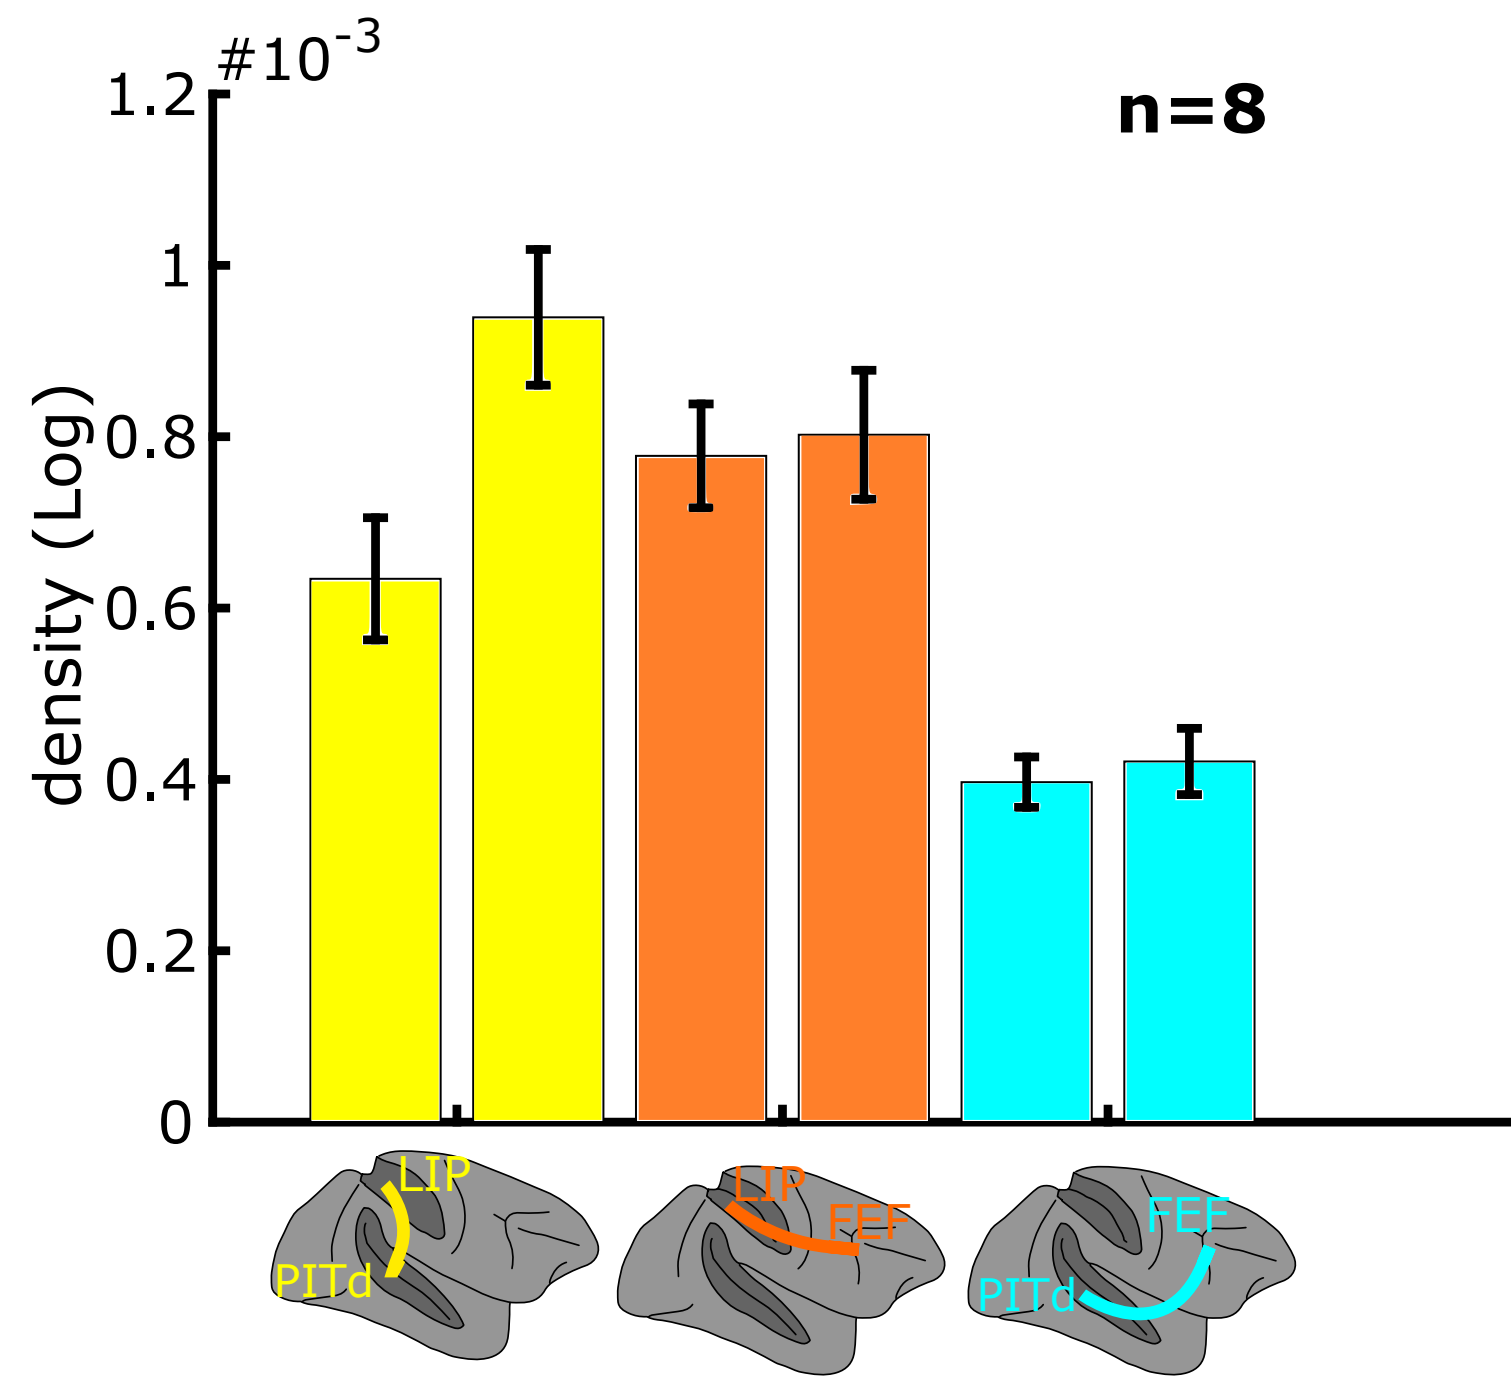

Supplement: supp [file elife-40520-supp-v1.zip › elife_poa_e40520_Figure_3_figure_supplement_3.pdf]

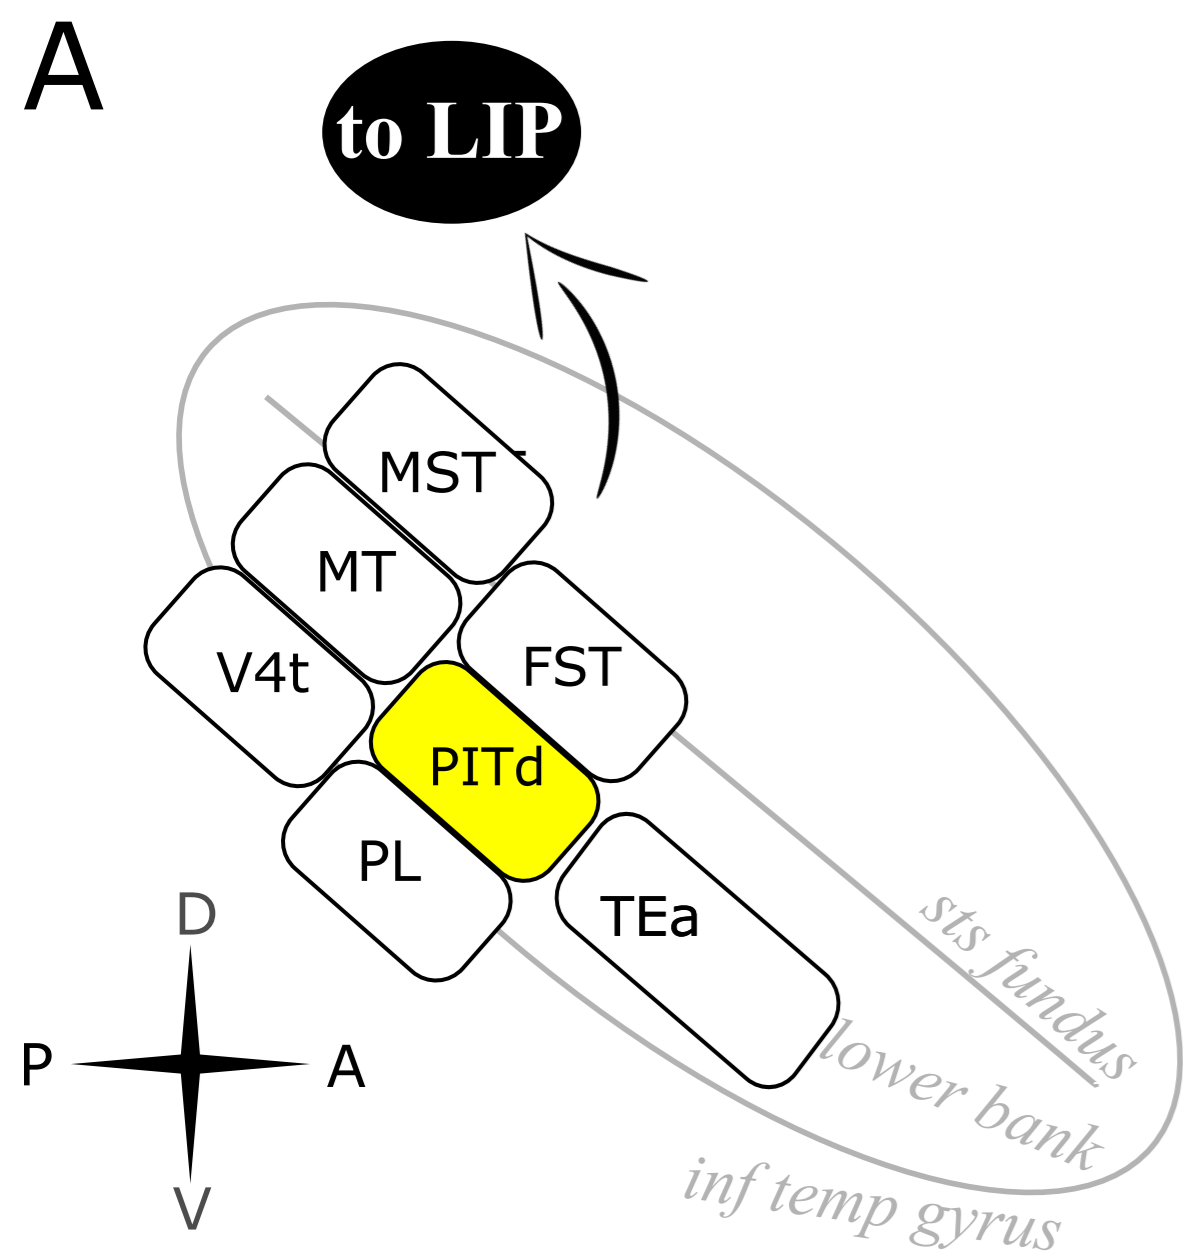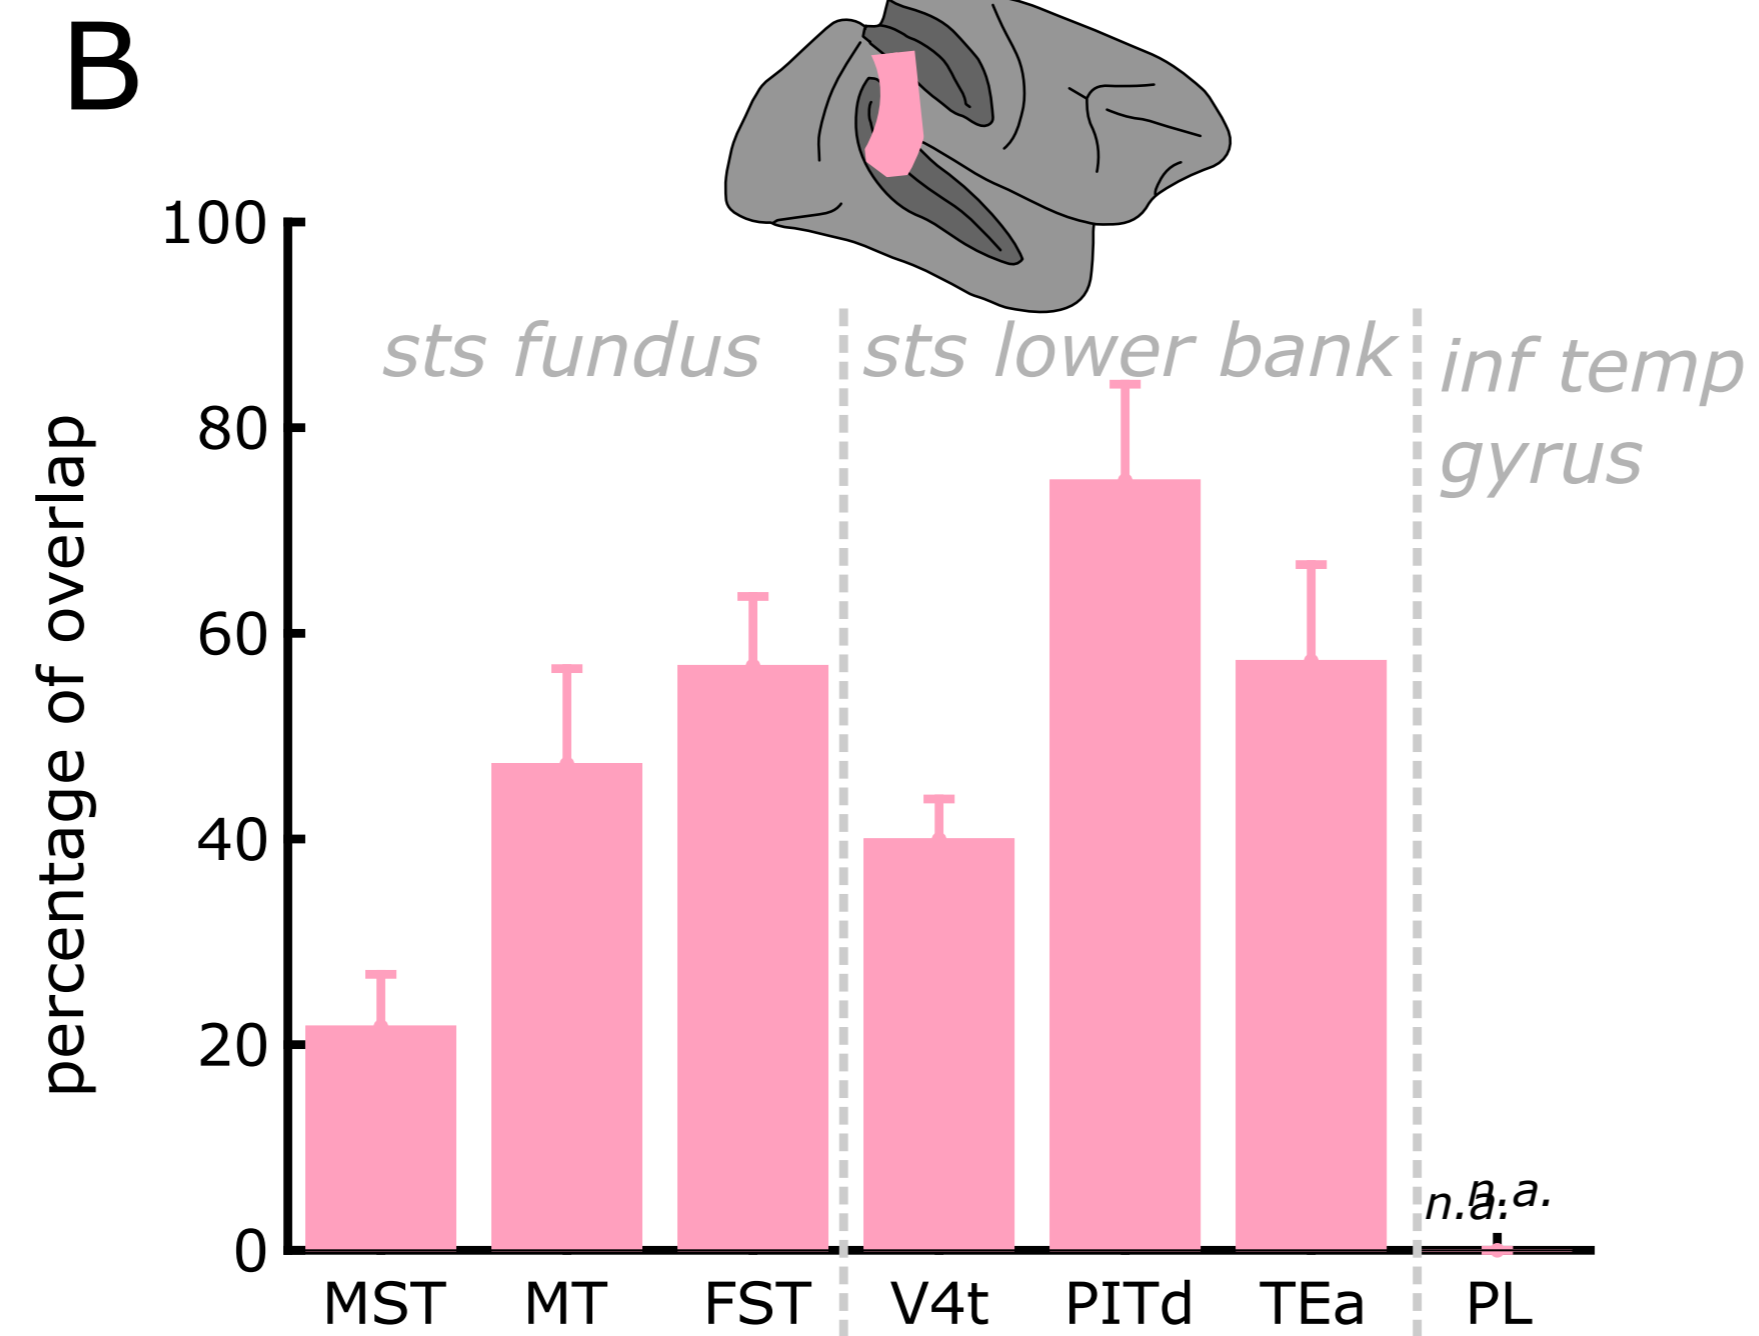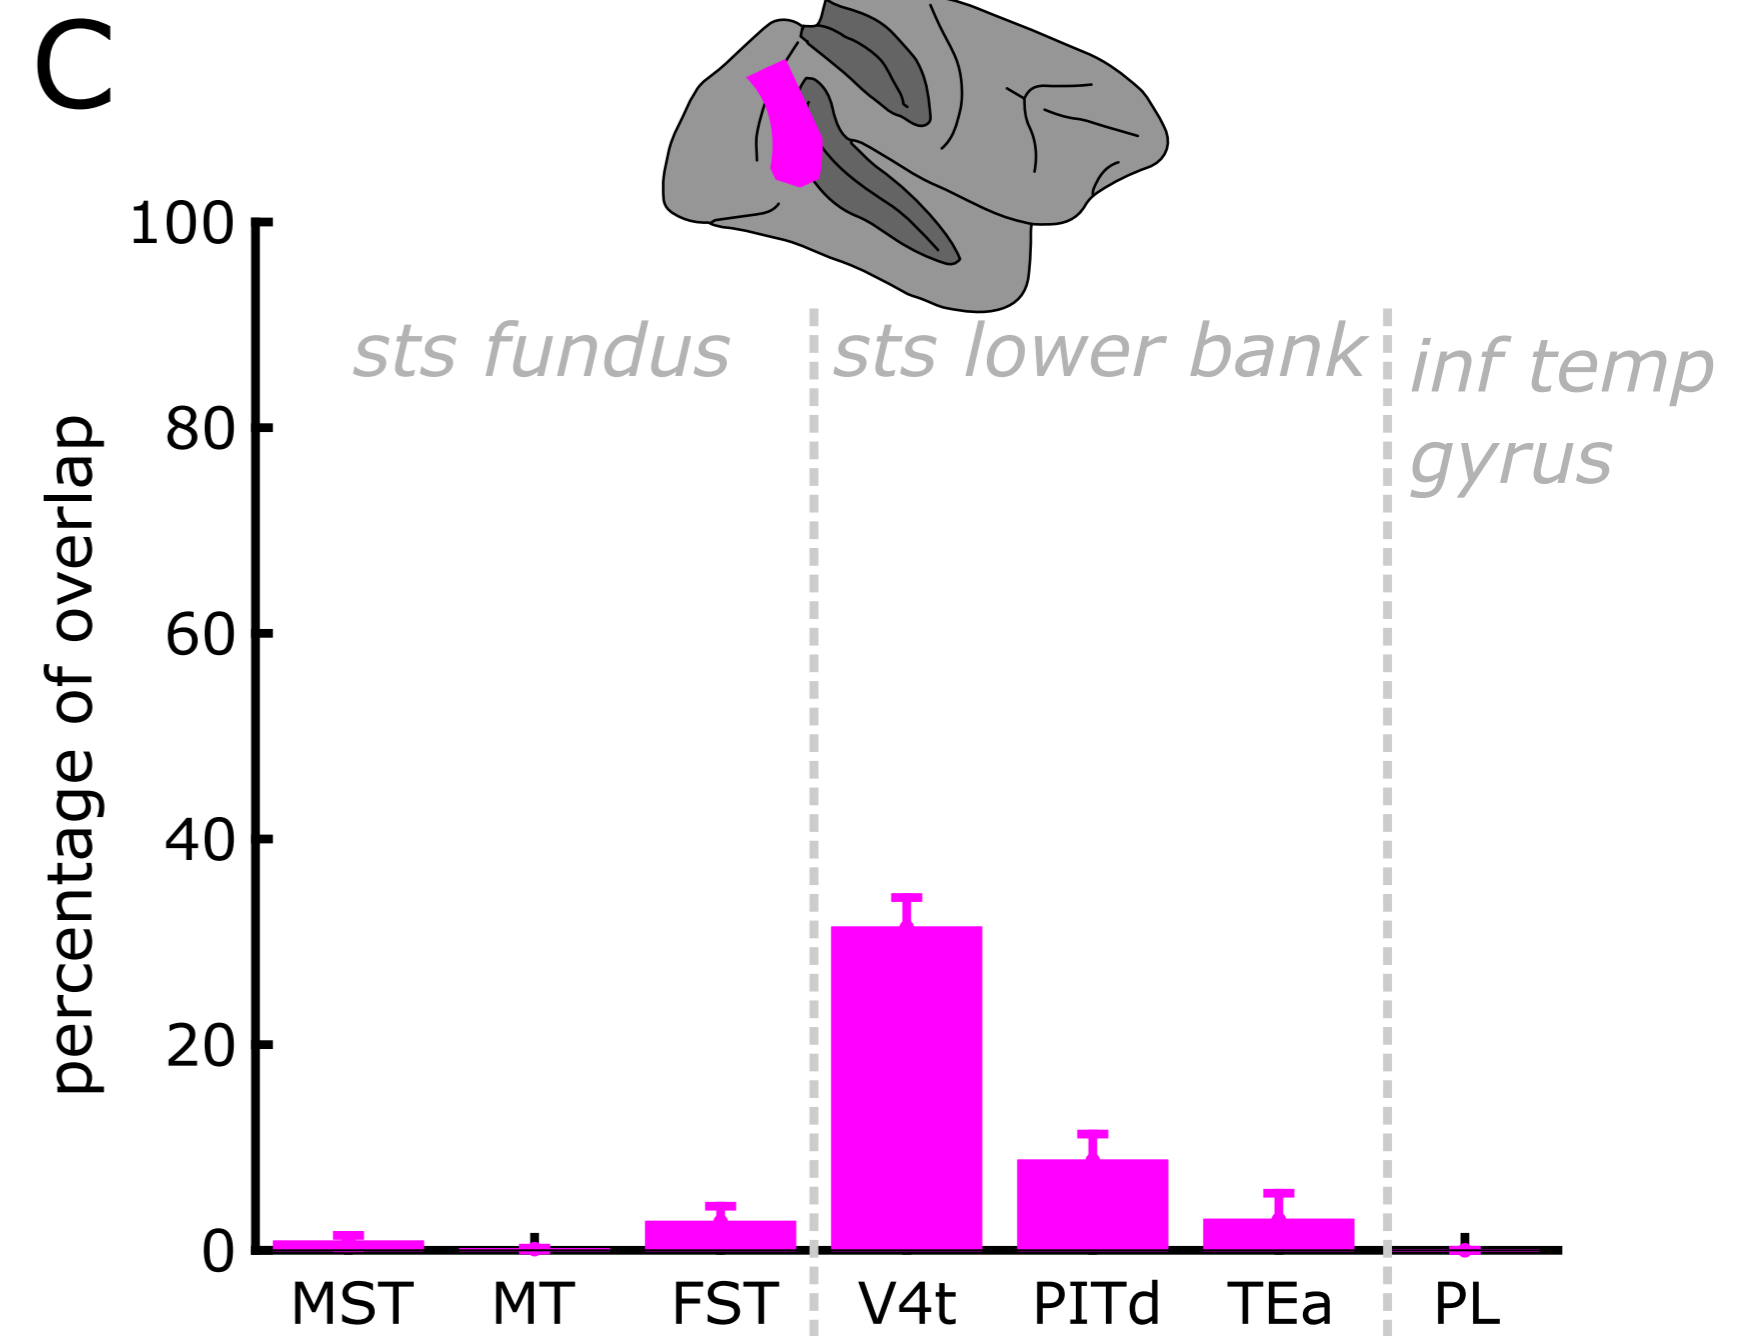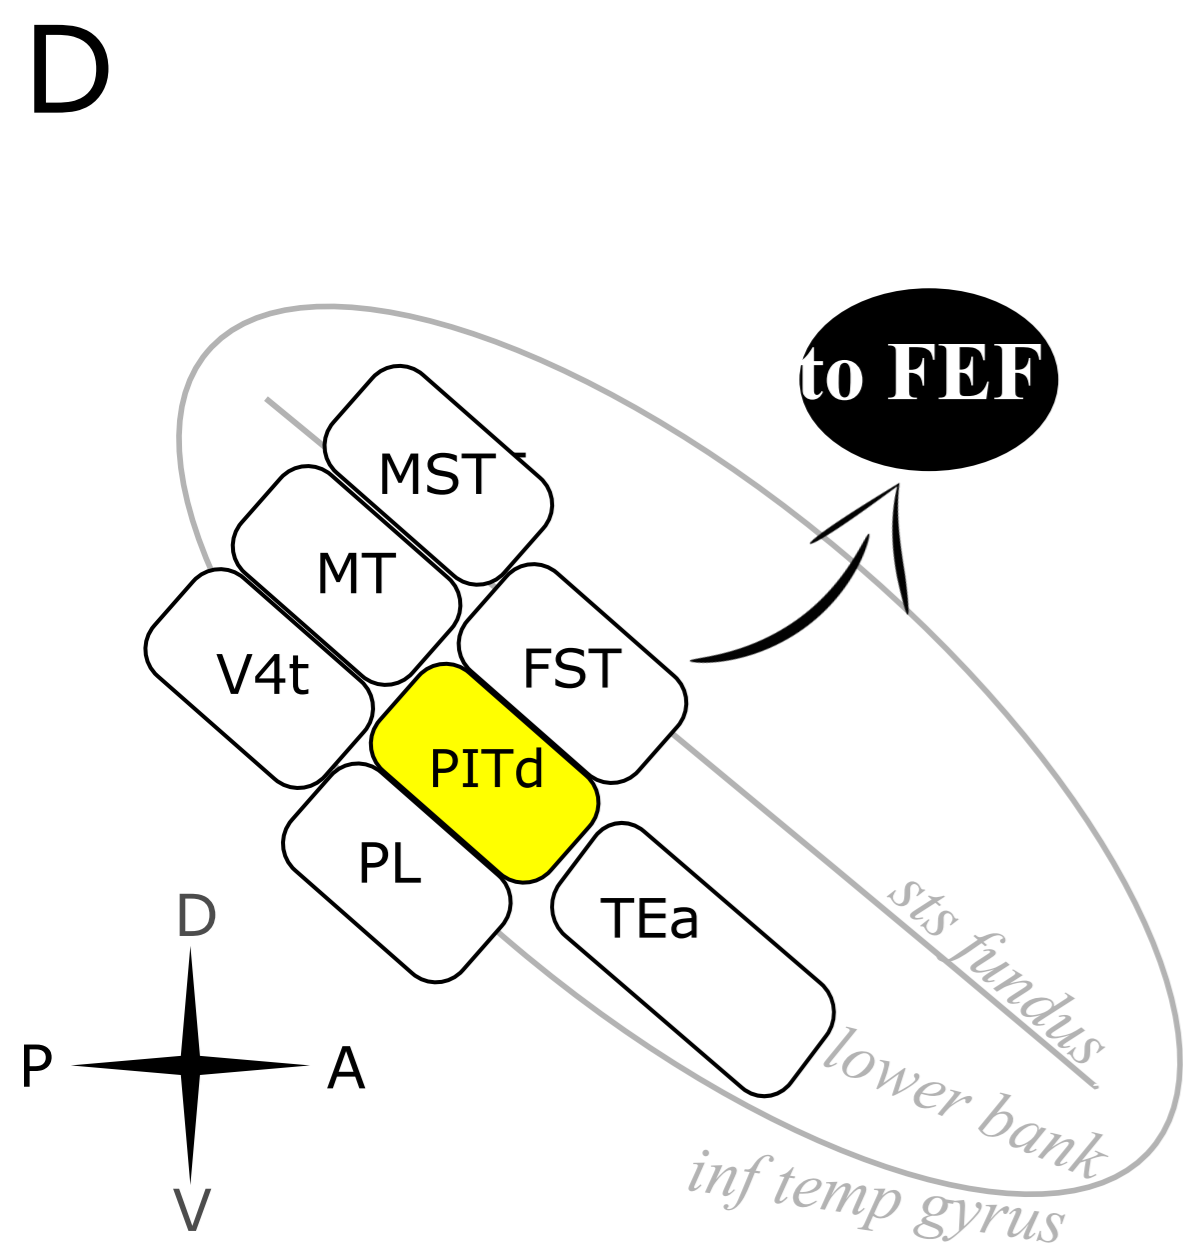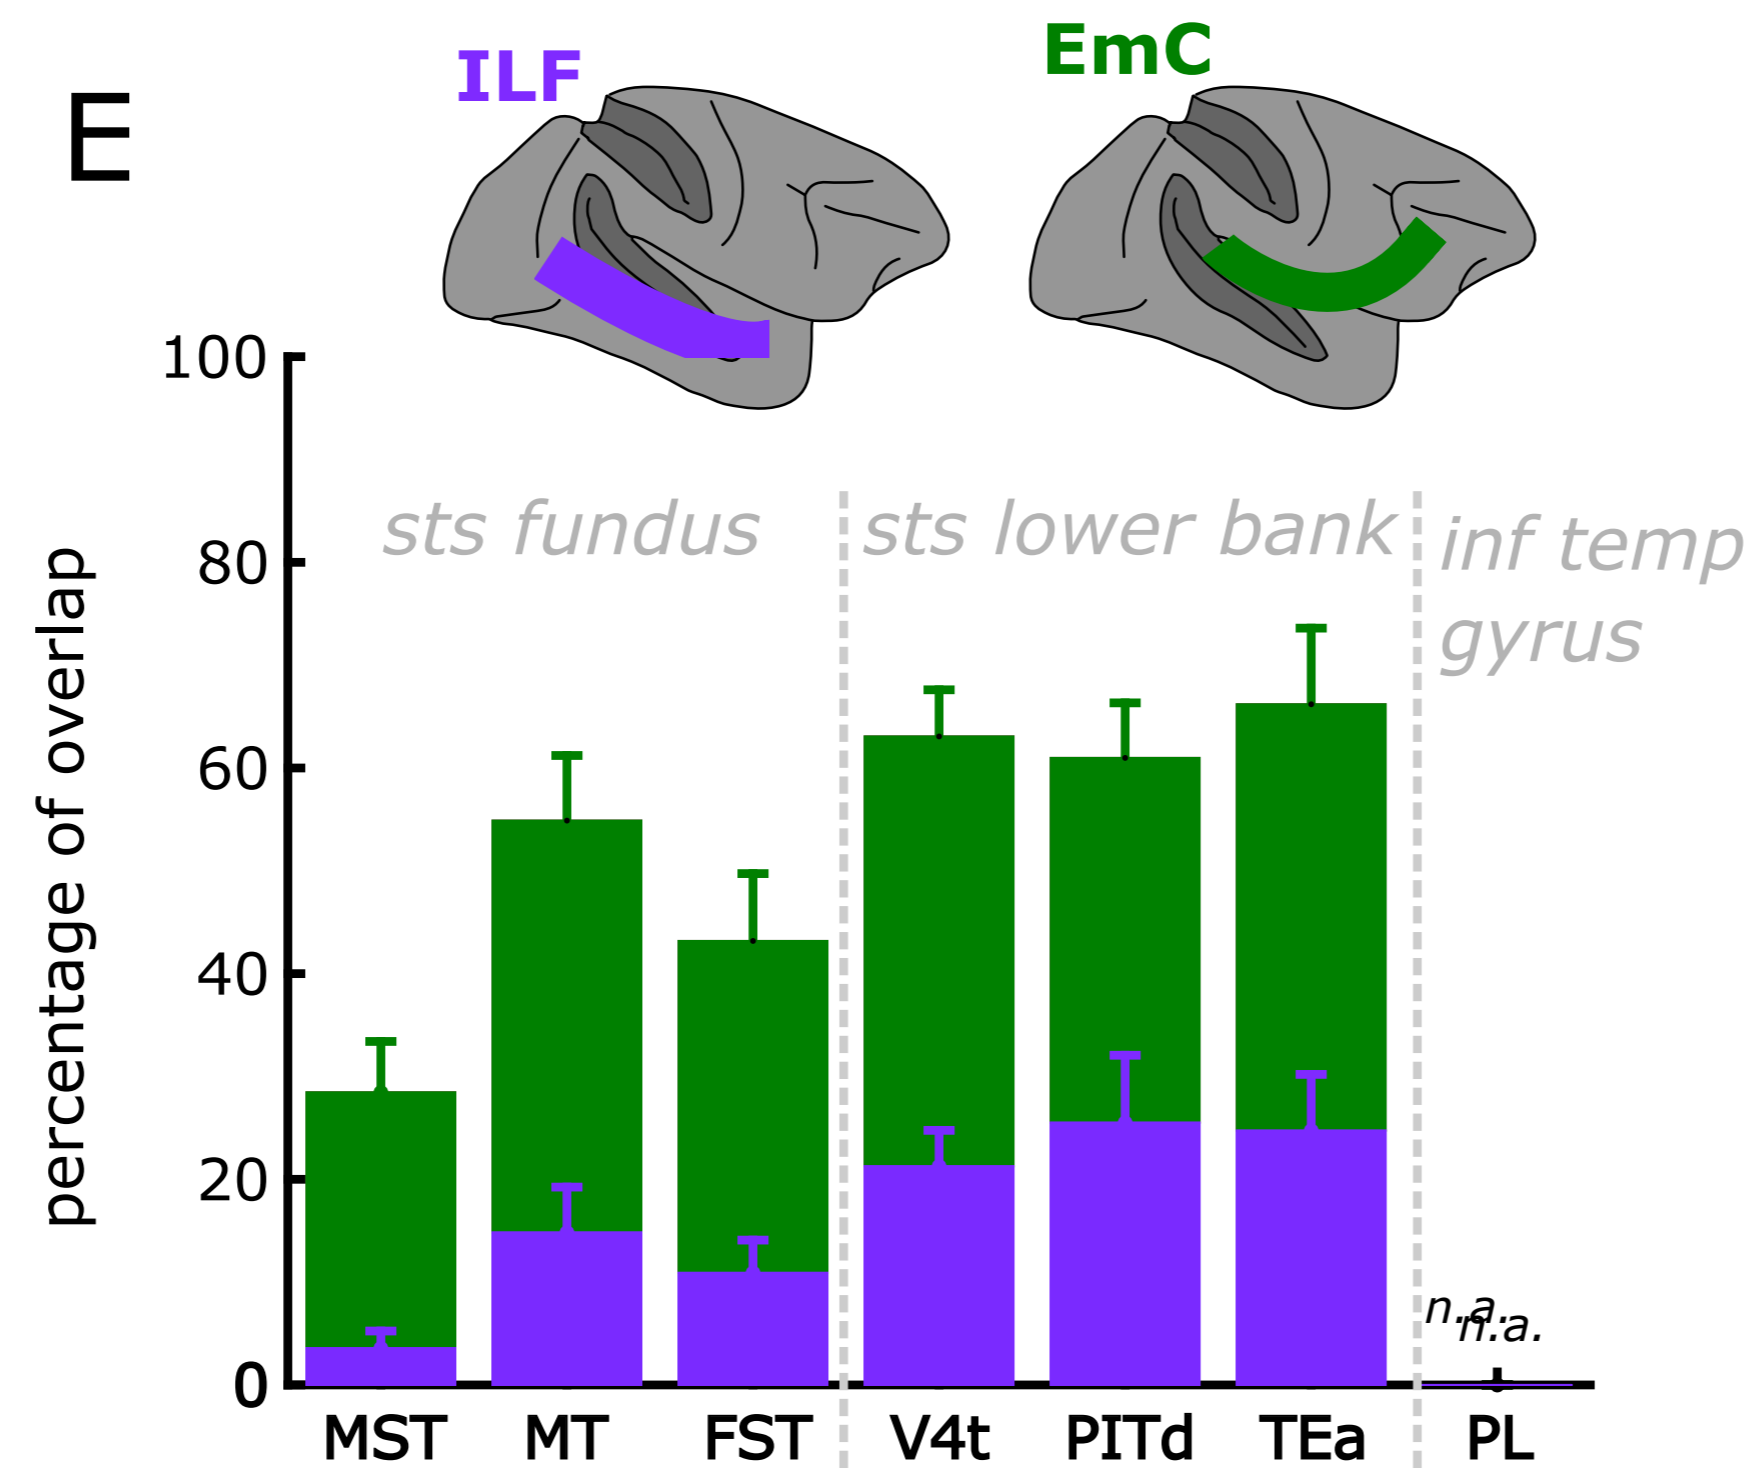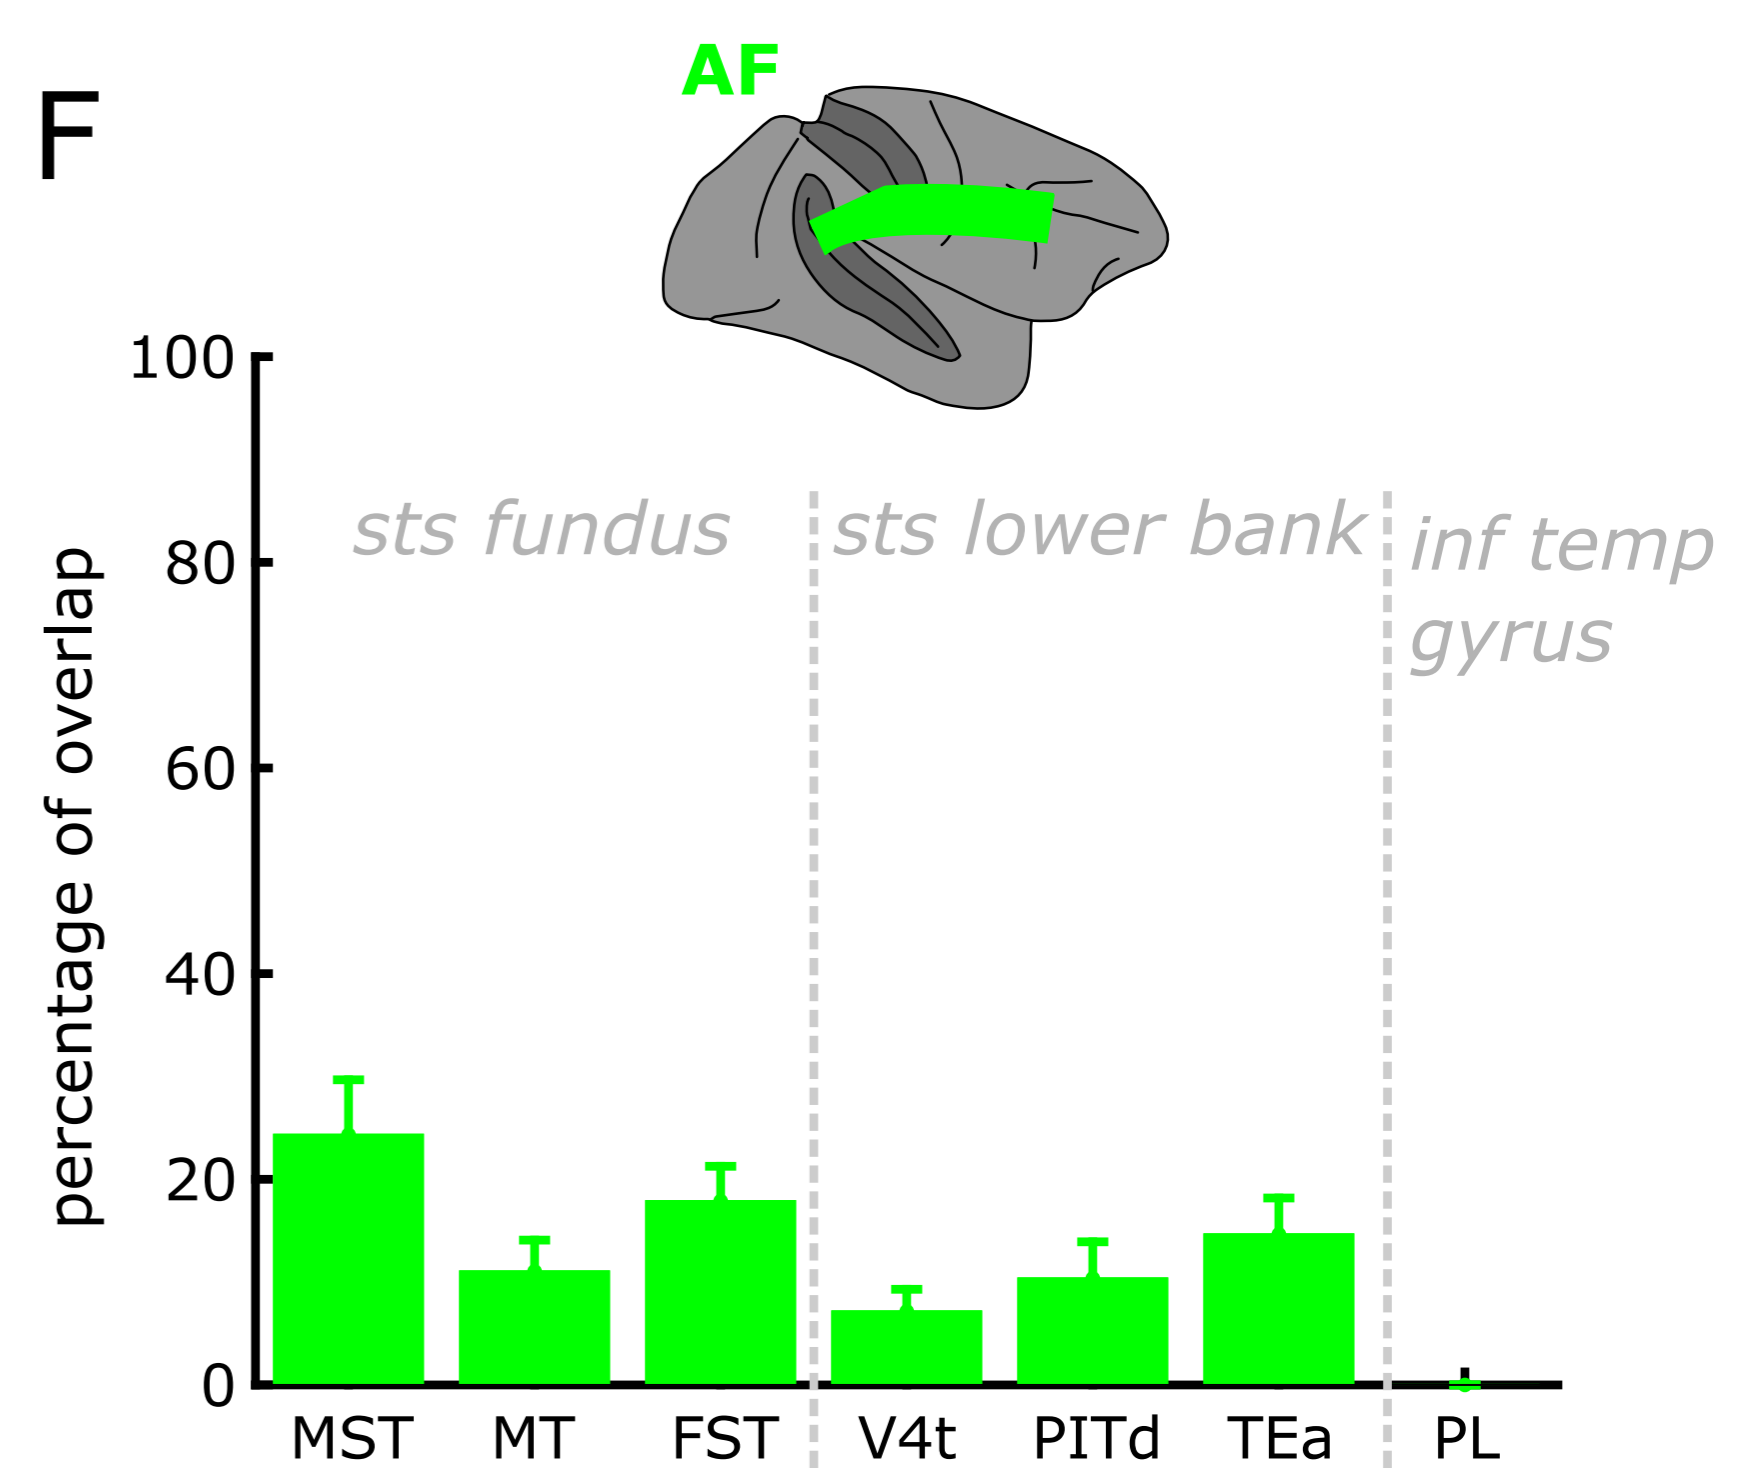

Supplement: supp [file elife-40520-supp-v1.zip › elife_poa_e40520_Figure_4_figure_supplement_4.pdf]

# Attention Network

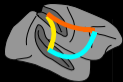

LH

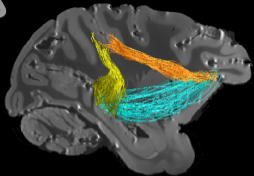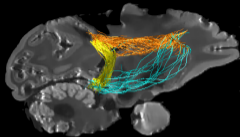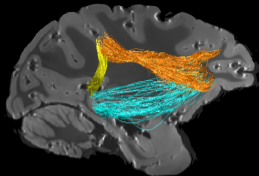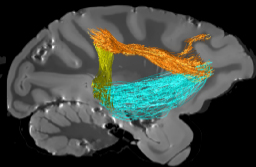

RH

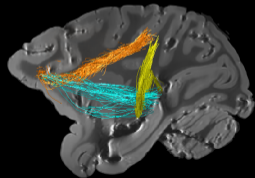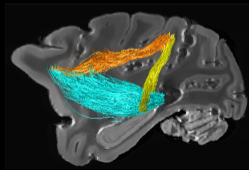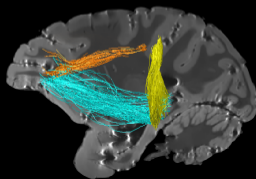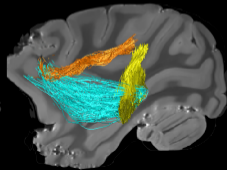

M1

M2

M3

M4

Supplement: supp [file elife-40520-supp-v1.zip › elife_poa_e40520_Figure_3_figure_supplement_1.pdf]

A

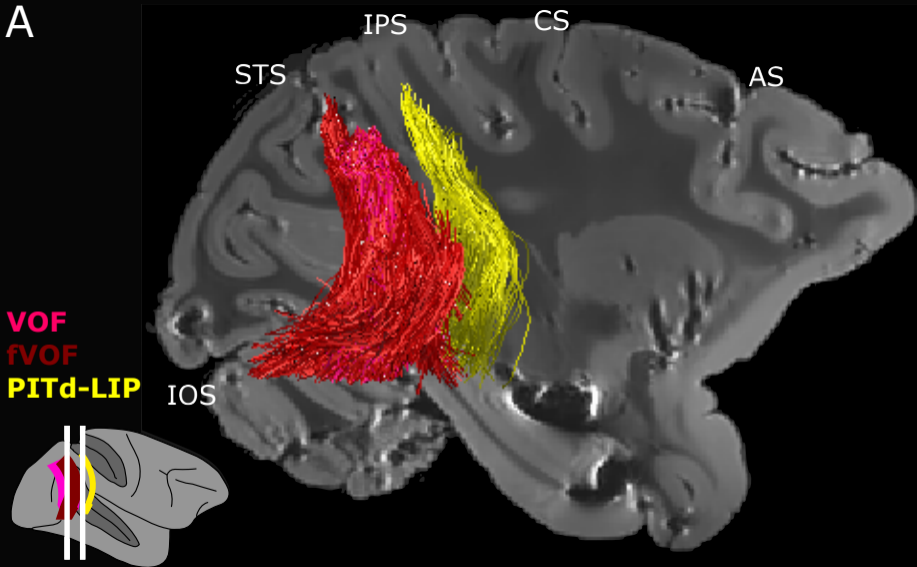

B

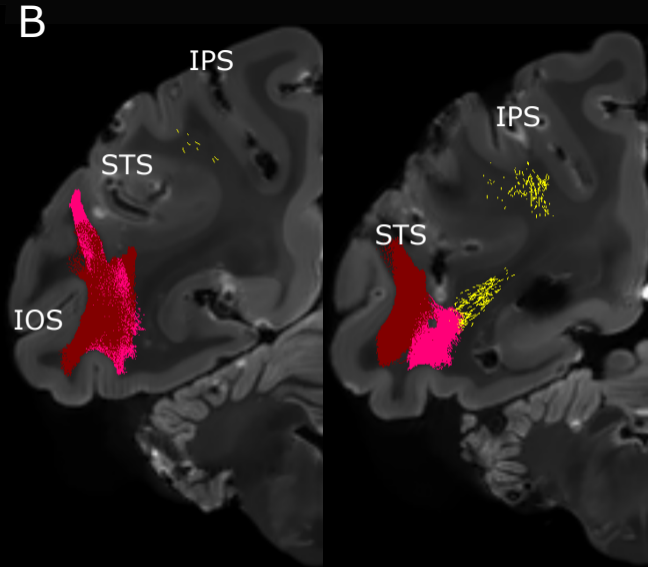

Supplement: supp [file elife-40520-supp-v1.zip › elife_poa_e40520_Figure_4_figure_supplement_3.pdf]

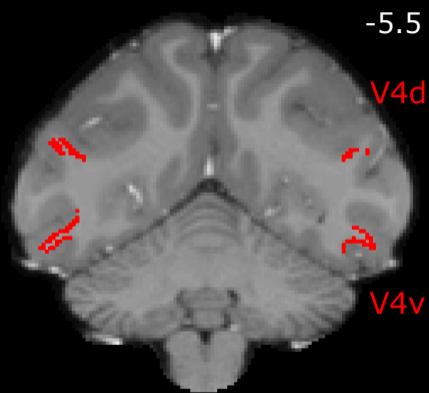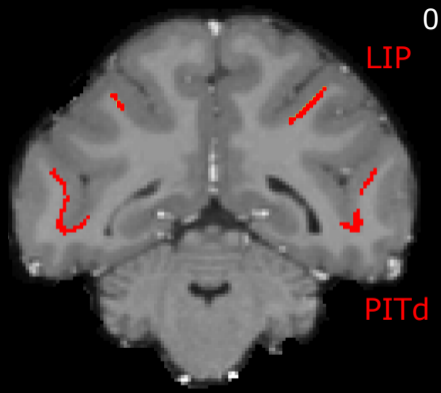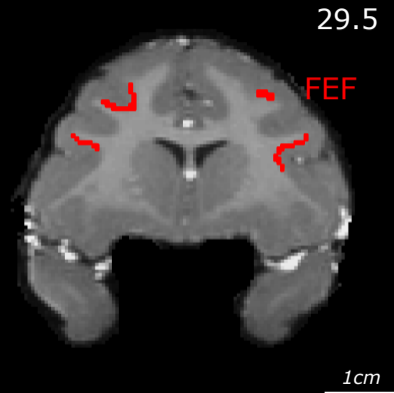

Supplement: supp [file elife-40520-supp-v1.zip › elife_poa_e40520_Figure_1_figure_supplement_1.pdf]

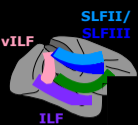

LH

RH

## Major Tracts

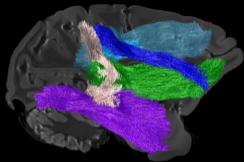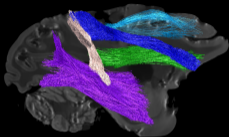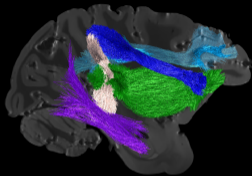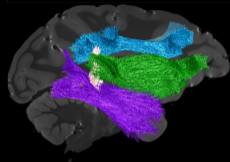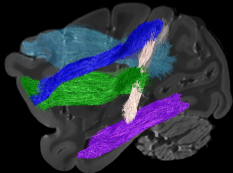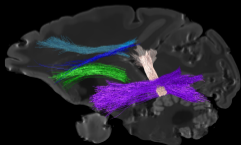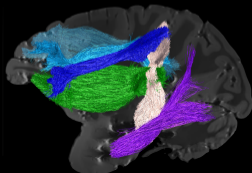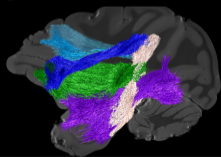

Supplement: supp [file elife-40520-supp-v1.zip › elife_poa_e40520_Figure_4_figure_supplement_2.pdf]
